# Supplementary material for: Decrease of Clone Diversity in IgM Repertoires of HBV Chronically Infected Individuals With High Level of Viral Replication
Source: PubMed Central journal article supplement (PMC7843509; doi:10.3389/fmicb.2020.615669), 2021-01-15
Supplement: Table_1.pdf [file Table_1.pdf]

**Supplementary Table 1. The Usage of IGHV Genes in IgM Repertoires**

| <b>HH-IgM</b> | <b>Frequency (%)</b> | <b>IHB-IgM</b> | <b>Frequency (%)</b> | <b>CHB-IgM</b> | <b>Frequency (%)</b> |
|---------------|----------------------|----------------|----------------------|----------------|----------------------|
| IGHV4-59      | 10.62                | IGHV4-59       | 11.49                | IGHV4-59       | 11.52                |
| IGHV1-69      | 10.36                | IGHV1-69       | 9.65                 | IGHV1-69       | 7.95                 |
| IGHV4-39      | 5.97                 | IGHV3-21       | 5.45                 | IGHV4-39       | 5.58                 |
| IGHV3-48      | 4.73                 | IGHV3-48       | 5.3                  | IGHV3-30       | 5.48                 |
| IGHV3-21      | 4.61                 | IGHV1-18       | 4.99                 | IGHV3-48       | 5.16                 |
| IGHV3-30      | 4.6                  | IGHV3-30       | 4.95                 | IGHV3-21       | 4.94                 |
| IGHV3-23      | 4.52                 | IGHV4-39       | 4.68                 | IGHV1-18       | 4.44                 |
| IGHV1-18      | 4.43                 | IGHV3-23       | 4.52                 | IGHV3-23       | 4.38                 |
| IGHV4-34      | 4.31                 | IGHV4-34       | 4.5                  | IGHV4-61       | 4.15                 |
| IGHV1-46      | 3.46                 | IGHV4-61       | 3.64                 | IGHV4-34       | 3.83                 |
| IGHV4-61      | 3.25                 | IGHV1-46       | 3.55                 | IGHV1-46       | 3.31                 |
| IGHV3-7       | 2.91                 | IGHV3-7        | 3.23                 | IGHV4-4        | 3.26                 |
| IGHV3-33      | 2.72                 | IGHV3-33       | 3.01                 | IGHV3-7        | 3.09                 |
| IGHV3-11      | 2.62                 | IGHV3-11       | 2.69                 | IGHV3-11       | 2.8                  |
| IGHV4-4       | 2.6                  | IGHV4-4        | 2.4                  | IGHV4-31       | 2.41                 |
| IGHV4-31      | 2.54                 | IGHV3-9        | 2.33                 | IGHV3-33       | 2.39                 |
| IGHV3-9       | 2.33                 | IGHV1-8        | 2.17                 | IGHV3-9        | 1.85                 |
| IGHV1-8       | 2.08                 | IGHV4-31       | 1.82                 | IGHV7-4-1      | 1.75                 |
| IGHV3-53      | 1.92                 | IGHV7-4-1      | 1.82                 | IGHV3-53       | 1.72                 |
| IGHV3-74      | 1.69                 | IGHV3-53       | 1.72                 | IGHV3-74       | 1.69                 |
| IGHV3-49      | 1.62                 | IGHV1-3        | 1.61                 | IGHV3-66       | 1.62                 |
| IGHV7-4-1     | 1.51                 | IGHV3-49       | 1.52                 | IGHV3-30-3     | 1.61                 |
| IGHV1-3       | 1.39                 | IGHV2-5        | 1.26                 | IGHV1-8        | 1.54                 |
| IGHV4-38-2    | 1.25                 | IGHV3-74       | 1.25                 | IGHV1-3        | 1.5                  |
| IGHV2-5       | 1.24                 | IGHV3-66       | 1.14                 | IGHV3-49       | 1.23                 |
| IGHV1-2       | 1.15                 | IGHV1-2        | 1.09                 | IGHV1-2        | 1.11                 |
| IGHV3-30-3    | 1.09                 | IGHV3-30-3     | 1.01                 | IGHV3-13       | 1.07                 |
| IGHV3-66      | 1.08                 | IGHV3-13       | 0.72                 | IGHV5-10-1     | 0.84                 |
| IGHV1-24      | 0.9                  | IGHV2-70       | 0.69                 | IGHV4-38-2     | 0.79                 |
| IGHV5-10-1    | 0.84                 | IGHV1-24       | 0.56                 | IGHV3-43       | 0.71                 |
| IGHV3-13      | 0.64                 | IGHV3-15       | 0.56                 | IGHV1-24       | 0.69                 |
| IGHV2-26      | 0.5                  | IGHV3-43       | 0.53                 | IGHV2-70       | 0.62                 |
| IGHV2-70      | 0.47                 | IGHV3-20       | 0.5                  | IGHV3-20       | 0.58                 |
| IGHV3-64      | 0.45                 | IGHV5-10-1     | 0.48                 | IGHV4-30-4     | 0.54                 |
| IGHV3-20      | 0.44                 | IGHV3-72       | 0.43                 | IGHV2-5        | 0.51                 |
| IGHV4-30-2    | 0.44                 | IGHV4-30-4     | 0.42                 | IGHV3-15       | 0.48                 |
| IGHV3-15      | 0.42                 | IGHV2-26       | 0.38                 | IGHV3-64       | 0.48                 |
| IGHV3-43      | 0.38                 | IGHV5-51       | 0.34                 | IGHV6-1        | 0.47                 |
| IGHV4-30-4    | 0.38                 | IGHV3-64       | 0.29                 | IGHV3-72       | 0.38                 |
| IGHV5-51      | 0.34                 | IGHV6-1        | 0.26                 | IGHV2-26       | 0.28                 |
| IGHV3-72      | 0.31                 | IGHV3-73       | 0.24                 | IGHV4-30-2     | 0.28                 |
| IGHV1-58      | 0.19                 | IGHV4-30-2     | 0.23                 | IGHV3-73       | 0.23                 |
| IGHV6-1       | 0.19                 | IGHV1-58       | 0.22                 | IGHV5-51       | 0.2                  |
| IGHV3-73      | 0.17                 | IGHV4-38-2     | 0.17                 | IGHV1-58       | 0.18                 |
| IGHV3-43D     | 0.16                 | IGHV3-NL1      | 0.1                  | IGHV3-NL1      | 0.12                 |
| IGHV3-NL1     | 0.08                 | IGHV3-64D      | 0.06                 | IGHV3-43D      | 0.11                 |
| IGHV3-64D     | 0.04                 | IGHV4-28       | 0.03                 | IGHV3-64D      | 0.09                 |
| IGHV1-69-2    | 0.03                 | IGHV1-45       | 0.03                 | IGHV1-45       | 0.02                 |
| IGHV4-28      | 0.01                 | IGHV2-70D      | 0.02                 | IGHV4-28       | 0.02                 |
| IGHV1-45      | 0.01                 | IGHV3-43D      | 0.01                 | IGHV1-69-2     | 0.01                 |
| IGHV2-70D     | 0.00 <sup>a</sup>    | IGHV1-69-2     | 0.00                 | IGHV2-70D      | 0.00                 |

a: The gene frequency was less than 0.001.
