# Supplementary material for: Decrease of Clone Diversity in IgM Repertoires of HBV Chronically Infected Individuals With High Level of Viral Replication
Source: PubMed Central journal article supplement (PMC7843509; doi:10.3389/fmicb.2020.615669), 2021-01-15
Supplement: Table_2.pdf [file Table_2.pdf]

**Supplementary Table 2. The Usage of IGHV Genes in IgG Repertoires**

| <b>HH-IgG</b> | <b>Frequency (%)</b> | <b>IHB-IgG</b> | <b>Frequency (%)</b> | <b>CHB-IgG</b> | <b>Frequency (%)</b> |
|---------------|----------------------|----------------|----------------------|----------------|----------------------|
| IGHV4-39      | 10.18                | IGHV4-59       | 12.86                | IGHV4-59       | 12.74                |
| IGHV4-59      | 8.27                 | IGHV3-7        | 9.86                 | IGHV4-39       | 5.79                 |
| IGHV3-30      | 6.37                 | IGHV4-61       | 6.31                 | IGHV3-30       | 5.31                 |
| IGHV3-7       | 5.44                 | IGHV3-23       | 5.08                 | IGHV3-11       | 5.19                 |
| IGHV3-21      | 5.37                 | IGHV3-30       | 5.07                 | IGHV3-23       | 4.88                 |
| IGHV3-48      | 5.34                 | IGHV3-48       | 4.90                 | IGHV4-61       | 4.46                 |
| IGHV3-23      | 4.55                 | IGHV3-21       | 4.72                 | IGHV1-69       | 4.40                 |
| IGHV1-69      | 4.43                 | IGHV4-39       | 4.27                 | IGHV3-7        | 4.15                 |
| IGHV1-18      | 4.25                 | IGHV1-69       | 3.75                 | IGHV3-21       | 3.80                 |
| IGHV3-74      | 3.85                 | IGHV4-34       | 3.23                 | IGHV4-31       | 3.67                 |
| IGHV1-46      | 3.50                 | IGHV1-46       | 3.20                 | IGHV3-48       | 3.56                 |
| IGHV2-5       | 3.14                 | IGHV3-9        | 3.04                 | IGHV1-18       | 2.79                 |
| IGHV3-33      | 2.81                 | IGHV3-74       | 2.97                 | IGHV4-4        | 2.70                 |
| IGHV3-9       | 2.74                 | IGHV4-4        | 2.91                 | IGHV4-34       | 2.69                 |
| IGHV3-11      | 2.73                 | IGHV3-11       | 2.58                 | IGHV2-5        | 2.54                 |
| IGHV4-61      | 2.49                 | IGHV2-5        | 2.13                 | IGHV3-66       | 2.40                 |
| IGHV4-34      | 1.86                 | IGHV3-33       | 1.75                 | IGHV4-30-4     | 2.30                 |
| IGHV3-49      | 1.69                 | IGHV1-18       | 1.69                 | IGHV3-53       | 2.20                 |
| IGHV1-8       | 1.67                 | IGHV3-49       | 1.61                 | IGHV3-49       | 2.16                 |
| IGHV4-4       | 1.50                 | IGHV4-31       | 1.49                 | IGHV3-33       | 2.07                 |
| IGHV4-38-2    | 1.41                 | IGHV3-15       | 1.42                 | IGHV3-74       | 1.82                 |
| IGHV3-15      | 1.38                 | IGHV3-72       | 1.38                 | IGHV5-10-1     | 1.62                 |
| IGHV7-4-1     | 1.26                 | IGHV3-53       | 1.31                 | IGHV1-46       | 1.58                 |
| IGHV3-64      | 1.17                 | IGHV2-70       | 1.23                 | IGHV7-4-1      | 1.50                 |
| IGHV3-43      | 1.14                 | IGHV3-66       | 1.13                 | IGHV3-15       | 1.41                 |
| IGHV3-72      | 1.12                 | IGHV5-10-1     | 1.00                 | IGHV1-8        | 1.34                 |
| IGHV3-53      | 1.08                 | IGHV3-13       | 0.79                 | IGHV3-9        | 1.32                 |
| IGHV4-31      | 1.04                 | IGHV3-64       | 0.75                 | IGHV1-3        | 0.94                 |
| IGHV3-66      | 0.96                 | IGHV5-51       | 0.73                 | IGHV3-30-3     | 0.93                 |
| IGHV3-30-3    | 0.87                 | IGHV7-4-1      | 0.71                 | IGHV4-38-2     | 0.92                 |
| IGHV5-51      | 0.85                 | IGHV3-30-3     | 0.68                 | IGHV4-30-2     | 0.91                 |
| IGHV1-2       | 0.76                 | IGHV3-43       | 0.66                 | IGHV3-13       | 0.86                 |
| IGHV5-10-1    | 0.62                 | IGHV1-2        | 0.65                 | IGHV1-2        | 0.66                 |
| IGHV1-3       | 0.60                 | IGHV1-8        | 0.61                 | IGHV3-64       | 0.62                 |
| IGHV2-70      | 0.50                 | IGHV1-24       | 0.60                 | IGHV3-43       | 0.61                 |
| IGHV1-24      | 0.45                 | IGHV3-20       | 0.55                 | IGHV3-73       | 0.55                 |
| IGHV3-13      | 0.42                 | IGHV1-3        | 0.47                 | IGHV3-72       | 0.46                 |
| IGHV4-30-4    | 0.40                 | IGHV2-26       | 0.43                 | IGHV5-51       | 0.43                 |
| IGHV6-1       | 0.38                 | IGHV3-73       | 0.39                 | IGHV6-1        | 0.43                 |
| IGHV3-20      | 0.34                 | IGHV4-30-4     | 0.37                 | IGHV1-24       | 0.33                 |
| IGHV3-73      | 0.30                 | IGHV4-38-2     | 0.20                 | IGHV2-26       | 0.30                 |
| IGHV2-26      | 0.27                 | IGHV6-1        | 0.19                 | IGHV2-70       | 0.21                 |
| IGHV3-43D     | 0.15                 | IGHV4-30-2     | 0.11                 | IGHV3-20       | 0.10                 |
| IGHV4-30-2    | 0.10                 | IGHV1-58       | 0.08                 | IGHV3-64D      | 0.09                 |
| IGHV1-58      | 0.10                 | IGHV3-64D      | 0.07                 | IGHV3-NL1      | 0.08                 |
| IGHV3-64D     | 0.06                 | IGHV3-NL1      | 0.05                 | IGHV1-58       | 0.06                 |
| IGHV3-NL1     | 0.05                 | IGHV3-43D      | 0.03                 | IGHV3-43D      | 0.06                 |
| IGHV4-28      | 0.02                 | IGHV4-28       | 0.02                 | IGHV4-28       | 0.02                 |
| IGHV1-69-2    | 0.01                 | IGHV1-45       | 0.01                 | IGHV1-45       | 0.01                 |
| IGHV1-45      | 0.01                 | IGHV1-69-2     | 0.00                 | IGHV1-69-2     | 0.01                 |
| IGHV2-70D     | 0.00                 | IGHV2-70D      | 0.00                 | IGHV2-70D      | 0.00                 |
