# Supplementary material for: Decrease of Clone Diversity in IgM Repertoires of HBV Chronically Infected Individuals With High Level of Viral Replication
Source: PubMed Central journal article supplement (PMC7843509; doi:10.3389/fmicb.2020.615669), 2021-01-15
Supplement: Table_3.pdf [file Table_3.pdf]

**Supplementary Table 3. The Usage of IGHD Genes in IgM Repertoires**

| <b>HH-IgM</b> | <b>Frequency (%)</b> | <b>IHB-IgM</b> | <b>Frequency (%)</b> | <b>CHB-IgM</b> | <b>Frequency (%)</b> |
|---------------|----------------------|----------------|----------------------|----------------|----------------------|
| IGHD3-10      | 15.62                | IGHD3-10       | 13.57                | IGHD2-2        | 11.47                |
| IGHD3-22      | 11.30                | IGHD3-22       | 9.58                 | IGHD3-3        | 10.69                |
| IGHD2-2       | 8.39                 | IGHD3-3        | 9.03                 | IGHD3-10       | 10.62                |
| IGHD6-13      | 8.12                 | IGHD2-2        | 8.95                 | IGHD6-13       | 8.96                 |
| IGHD6-19      | 6.56                 | IGHD6-13       | 8.20                 | IGHD3-22       | 7.73                 |
| IGHD2-15      | 5.99                 | IGHD6-19       | 6.02                 | IGHD6-19       | 6.09                 |
| IGHD3-3       | 5.98                 | IGHD2-15       | 5.83                 | IGHD1-26       | 5.60                 |
| IGHD1-26      | 5.65                 | IGHD1-26       | 5.71                 | IGHD2-15       | 5.20                 |
| IGHD3-9       | 5.16                 | IGHD3-16       | 4.81                 | IGHD3-16       | 4.58                 |
| IGHD3-16      | 4.53                 | IGHD3-9        | 4.56                 | IGHD6-6        | 4.46                 |
| IGHD4-17      | 4.11                 | IGHD4-17       | 3.66                 | IGHD2-21       | 3.45                 |
| IGHD5-18      | 3.64                 | IGHD6-6        | 3.47                 | IGHD4-17       | 3.44                 |
| IGHD5-12      | 3.46                 | IGHD5-18       | 3.31                 | IGHD5-12       | 3.36                 |
| IGHD2-21      | 3.11                 | IGHD2-21       | 3.11                 | IGHD3-9        | 3.18                 |
| IGHD6-6       | 2.27                 | IGHD5-12       | 3.08                 | IGHD5-18       | 2.90                 |
| IGHD2-8       | 1.82                 | IGHD2-8        | 2.07                 | IGHD2-8        | 2.61                 |
| IGHD1-1       | 1.61                 | IGHD1-1        | 1.92                 | IGHD1-1        | 2.09                 |
| IGHD1-7       | 0.91                 | IGHD1-7        | 1.04                 | IGHD1-7        | 1.21                 |
| IGHD6-25      | 0.73                 | IGHD6-25       | 0.86                 | IGHD7-27       | 0.97                 |
| IGHD7-27      | 0.62                 | IGHD7-27       | 0.72                 | IGHD6-25       | 0.76                 |
| IGHD1-20      | 0.40                 | IGHD1-20       | 0.50                 | IGHD1-20       | 0.64                 |
