# Supplementary material for: Decrease of Clone Diversity in IgM Repertoires of HBV Chronically Infected Individuals With High Level of Viral Replication
Source: PubMed Central journal article supplement (PMC7843509; doi:10.3389/fmicb.2020.615669), 2021-01-15
Supplement: Table_4.pdf [file Table_4.pdf]

**Supplementary Table 4. The Usage of IGHD Genes in IgG Repertoires**

| <b>HH-IgG</b> | <b>Frequency (%)</b> | <b>IHB-IgG</b> | <b>Frequency (%)</b> | <b>CHB-IgG</b> | <b>Frequency (%)</b> |
|---------------|----------------------|----------------|----------------------|----------------|----------------------|
| IGHD3-10      | 13.28                | IGHD3-10       | 13.77                | IGHD3-10       | 14.51                |
| IGHD3-22      | 8.01                 | IGHD3-22       | 11.70                | IGHD2-2        | 10.09                |
| IGHD2-2       | 7.05                 | IGHD2-2        | 8.34                 | IGHD3-22       | 7.90                 |
| IGHD6-13      | 8.28                 | IGHD3-3        | 7.50                 | IGHD3-16       | 6.13                 |
| IGHD6-19      | 7.78                 | IGHD1-26       | 6.11                 | IGHD2-15       | 5.76                 |
| IGHD2-15      | 6.77                 | IGHD2-21       | 5.53                 | IGHD3-3        | 5.71                 |
| IGHD3-3       | 6.01                 | IGHD3-16       | 5.35                 | IGHD6-13       | 5.61                 |
| IGHD1-26      | 6.06                 | IGHD6-13       | 5.29                 | IGHD6-6        | 5.50                 |
| IGHD3-9       | 3.54                 | IGHD6-19       | 5.24                 | IGHD6-19       | 5.18                 |
| IGHD3-16      | 7.47                 | IGHD2-15       | 5.21                 | IGHD1-26       | 4.91                 |
| IGHD4-17      | 3.38                 | IGHD3-9        | 4.52                 | IGHD2-21       | 4.80                 |
| IGHD5-18      | 2.73                 | IGHD5-12       | 3.42                 | IGHD3-9        | 3.94                 |
| IGHD5-12      | 4.11                 | IGHD2-8        | 3.23                 | IGHD5-12       | 3.61                 |
| IGHD2-21      | 4.60                 | IGHD4-17       | 3.09                 | IGHD2-8        | 3.49                 |
| IGHD6-6       | 1.88                 | IGHD1-1        | 3.01                 | IGHD5-18       | 3.41                 |
| IGHD2-8       | 4.10                 | IGHD6-6        | 2.64                 | IGHD4-17       | 3.20                 |
| IGHD1-1       | 2.01                 | IGHD5-18       | 2.38                 | IGHD1-1        | 2.33                 |
| IGHD1-7       | 0.51                 | IGHD1-7        | 1.31                 | IGHD6-25       | 1.46                 |
| IGHD6-25      | 1.11                 | IGHD1-20       | 0.87                 | IGHD7-27       | 1.27                 |
| IGHD7-27      | 0.78                 | IGHD7-27       | 0.83                 | IGHD1-7        | 0.65                 |
| IGHD1-20      | 0.56                 | IGHD6-25       | 0.66                 | IGHD1-20       | 0.52                 |
