# Supplementary material for: Decrease of Clone Diversity in IgM Repertoires of HBV Chronically Infected Individuals With High Level of Viral Replication
Source: PubMed Central journal article supplement (PMC7843509; doi:10.3389/fmicb.2020.615669), 2021-01-15
Supplement: Table_5.pdf [file Table_5.pdf]

**Supplementary Table 5. The Usage of IGHJ Genes in IgM Repertoires**

| <b>HH-IgM</b> | <b>Frequency (%)</b> | <b>IHB-IgM</b> | <b>Frequency (%)</b> | <b>CHB-IgM</b> | <b>Frequency (%)</b> |
|---------------|----------------------|----------------|----------------------|----------------|----------------------|
| IGHJ3_02      | 33.98                | IGHJ3_02       | 30.35                | IGHJ3_02       | 37.96                |
| IGHJ6_02      | 22.68                | IGHJ6_02       | 25.32                | IGHJ6_03       | 18.53                |
| IGHJ4_02      | 11.15                | IGHJ6_03       | 12.51                | IGHJ6_02       | 14.52                |
| IGHJ6_03      | 10.20                | IGHJ4_02       | 10.66                | IGHJ2_01       | 10.55                |
| IGHJ2_01      | 9.97                 | IGHJ2_01       | 8.65                 | IGHJ4_02       | 8.10                 |
| IGHJ5_02      | 4.38                 | IGHJ5_02       | 4.85                 | IGHJ5_02       | 3.00                 |
| IGHJ3_01      | 2.71                 | IGHJ3_01       | 2.63                 | IGHJ3_01       | 2.80                 |
| IGHJ4_01      | 1.30                 | IGHJ4_01       | 1.26                 | IGHJ4_01       | 1.44                 |
| IGHJ1_01      | 1.21                 | IGHJ1_01       | 1.08                 | IGHJ1_01       | 0.93                 |
| IGHJ5_01      | 0.65                 | IGHJ6_04       | 0.79                 | IGHJ6_04       | 0.73                 |
| IGHJ4_03      | 0.64                 | IGHJ4_03       | 0.71                 | IGHJ4_03       | 0.64                 |
| IGHJ6_04      | 0.64                 | IGHJ5_01       | 0.64                 | IGHJ5_01       | 0.53                 |
| IGHJ6_01      | 0.49                 | IGHJ6_01       | 0.53                 | IGHJ6_01       | 0.27                 |
