# Supplementary material for: Decrease of Clone Diversity in IgM Repertoires of HBV Chronically Infected Individuals With High Level of Viral Replication
Source: PubMed Central journal article supplement (PMC7843509; doi:10.3389/fmicb.2020.615669), 2021-01-15
Supplement: Table_6.pdf [file Table_6.pdf]

**Supplementary Table 6. The Usage of IGHJ Genes in IgG Repertoires**

| <b>HH-IgG</b> | <b>Frequency (%)</b> | <b>IHB-IgG</b> | <b>Frequency (%)</b> | <b>CHB-IgG</b> | <b>Frequency (%)</b> |
|---------------|----------------------|----------------|----------------------|----------------|----------------------|
| IGHJ6_02      | 21.36                | IGHJ3_02       | 22.60                | IGHJ3_02       | 21.09                |
| IGHJ3_02      | 21.11                | IGHJ6_02       | 18.10                | IGHJ6_02       | 17.32                |
| IGHJ4_02      | 17.77                | IGHJ4_02       | 15.16                | IGHJ4_02       | 16.22                |
| IGHJ6_03      | 10.12                | IGHJ6_03       | 12.16                | IGHJ6_03       | 15.42                |
| IGHJ3_01      | 9.80                 | IGHJ3_01       | 11.06                | IGHJ3_01       | 7.92                 |
| IGHJ2_01      | 6.51                 | IGHJ2_01       | 6.06                 | IGHJ2_01       | 6.79                 |
| IGHJ5_02      | 5.05                 | IGHJ5_02       | 5.81                 | IGHJ5_02       | 6.31                 |
| IGHJ4_01      | 3.36                 | IGHJ4_01       | 2.91                 | IGHJ4_01       | 3.27                 |
| IGHJ5_01      | 1.54                 | IGHJ5_01       | 2.21                 | IGHJ1_01       | 2.45                 |
| IGHJ1_01      | 1.21                 | IGHJ1_01       | 1.38                 | IGHJ5_01       | 1.22                 |
| IGHJ4_03      | 0.87                 | IGHJ6_04       | 1.11                 | IGHJ6_04       | 0.79                 |
| IGHJ6_01      | 0.67                 | IGHJ6_01       | 0.74                 | IGHJ4_03       | 0.64                 |
| IGHJ6_04      | 0.64                 | IGHJ4_03       | 0.71                 | IGHJ6_01       | 0.56                 |
