# Supplementary material for: Decrease of Clone Diversity in IgM Repertoires of HBV Chronically Infected Individuals With High Level of Viral Replication
Source: PubMed Central journal article supplement (PMC7843509; doi:10.3389/fmicb.2020.615669), 2021-01-15
Supplement: Table_7.pdf [file Table_7.pdf]

**Supplementary Table 7. The Comparisons of the Somatic Hypermutation Levels in the Antibody Repertoires of the Three Libraries**

|                                 | Library |         |         | <i>p, OR(95%CI)<sup>a</sup></i>  |                                 |                                 |
|---------------------------------|---------|---------|---------|----------------------------------|---------------------------------|---------------------------------|
|                                 | HH (%)  | IHB (%) | CHB (%) | HH vs. IHB                       | HH vs. CHB                      | IHB vs. CHB                     |
| <b>IgM repertoire</b>           |         |         |         |                                  |                                 |                                 |
| <b>V<sub>Iden</sub> &gt;90%</b> | 94.21   | 94.18   | 93.08   | 0.471,<br>1.006(0.990,1.023)     | <2.2E-16,<br>1.212(1.192,1.231) | <2.2E-16,<br>1.204(1.185,1.224) |
| <b>CDR1</b>                     | 22.71   | 22.17   | 25.95   | 3.1E-11,<br>0.969(0.961,0.978)   | <2.2E-16,<br>1.193(1.182,1.204) | <2.2E-16,<br>1.230(1.219,1.242) |
| <b>CDR2</b>                     | 41.34   | 41.65   | 45.39   | 0.001,<br>1.013(1.005,1.021)     | <2.2E-16,<br>1.179(1.170,1.189) | <2.2E-16,<br>1.164(1.155,1.173) |
| <b>IgG repertoire</b>           |         |         |         |                                  |                                 |                                 |
| <b>V<sub>Iden</sub> &gt;90%</b> | 59.67   | 56.95   | 57.55   | <2.2E-16,<br>1.118(1.102,1.135)  | <2.2E-16,<br>1.091(1.076,1.107) | 0.0004,<br>0.976(0.963,0.989)   |
| <b>CDR1</b>                     | 79.58   | 83.37   | 79.53   | <2.2E-16,<br>1.287(1.263,1.310)  | 0.723,<br>0.997(0.980,1.014)    | <2.2E-16,<br>0.775(0.761,0.788) |
| <b>CDR2</b>                     | 82.91   | 85.58   | 87.50   | <2.2E-16,<br>1.223 (1.199,1.247) | <2.2E-16,<br>1.442(1.413,1.471) | <2.2E-16,<br>1.179(1.156,1.202) |

a: Calculated by the logistic regression.
