# Supplementary material for: Decrease of Clone Diversity in IgM Repertoires of HBV Chronically Infected Individuals With High Level of Viral Replication
Source: PubMed Central journal article supplement (PMC7843509; doi:10.3389/fmicb.2020.615669), 2021-01-15
Supplement: Table_8.pdf [file Table_8.pdf]

**Supplementary Table 8. The Occurrence of Junctional Modifications in IgM Repertoires**

| Junctional Modification <sup>a</sup>                         | Occurrence (%)                      |                                     |                                   |                                     |                                     |                                    |                                     |                                     |                                   |                                     |
|--------------------------------------------------------------|-------------------------------------|-------------------------------------|-----------------------------------|-------------------------------------|-------------------------------------|------------------------------------|-------------------------------------|-------------------------------------|-----------------------------------|-------------------------------------|
|                                                              | 3VP                                 | 5DP                                 | 3DP                               | 5JP                                 | N1                                  | N2                                 | 3VT                                 | 5DT                                 | 3DT                               | 5JT                                 |
| <b>HH</b>                                                    | 20.92                               | 6.40                                | 6.21                              | 7.26                                | 90.17                               | 88.21                              | 60.62                               | 85.65                               | 84.44                             | 83.16                               |
| <b>IHB</b>                                                   | 20.67                               | 5.88                                | 6.40                              | 6.80                                | 89.71                               | 87.95                              | 61.02                               | 86.11                               | 84.54                             | 83.72                               |
| <b>CHB</b>                                                   | 19.40                               | 5.44                                | 6.18                              | 6.38                                | 89.10                               | 87.80                              | 61.85                               | 86.32                               | 84.70                             | 83.84                               |
| <i>p, <sup>b</sup><br/>OR(95%CI)</i><br><b>(HH vs. IHB)</b>  | 0.001,<br>0.985<br>(0.976,0.994)    | <2.2E-16,<br>0.914<br>(0.900,0.929) | 6.0E-5,<br>1.033<br>(1.017,1.049) | <2.2E-16,<br>0.931<br>(0.917,0.945) | 5.0E-15,<br>0.951<br>(0.939,0.963)  | 4.3E-5,<br>0.976<br>(0.964,0.987)  | 4.0E-5,<br>1.017<br>(1.009,1.024)   | 8.9E-12,<br>1.039<br>(1.028,1.050)  | 0.167,<br>1.007<br>(0.997,1.018)  | 1.0E-14,<br>1.041<br>(1.031,1.052)  |
| <i>p, <sup>b</sup><br/>OR(95%CI)</i><br><b>(HH vs. CHB)</b>  | <2.2E-16,<br>0.910<br>(0.901,0.919) | <2.2E-16,<br>0.841<br>(0.827,0.855) | 0.645,<br>0.996<br>(0.980,1.013)  | <2.2E-16,<br>0.869<br>(0.856,0.883) | <2.2E-16,<br>0.891<br>(0.879,0.903) | 5.7E-10,<br>0.962<br>(0.950,0.974) | <2.2E-16,<br>1.053<br>(1.044,1.062) | <2.2E-16,<br>1.057<br>(1.045,1.069) | 4.0E-4,<br>1.020<br>(1.009,1.031) | <2.2E-16,<br>1.050<br>(1.039,1.062) |
| <i>p, <sup>b</sup><br/>OR(95%CI)</i><br><b>(IHB vs. CHB)</b> | <2.2E-16,<br>0.924<br>(0.915,0.933) | <2.2E-16,<br>0.920<br>(0.905,0.936) | 1.2E-5,<br>0.965<br>(0.949,0.980) | <2.2E-16,<br>0.934<br>(0.919,0.949) | <2.2E-16,<br>0.937<br>(0.925,0.949) | 0.021,<br>0.986<br>(0.974,0.998)   | <2.2E-16,<br>1.036<br>(1.027,1.044) | <2.2E-16,<br>1.017<br>(1.006,1.029) | 0.026,<br>1.012<br>(1.001,1.023)  | 0.117,<br>1.009<br>(0.998,1.019)    |

a: Junctional modification: 3VP and 3VT: the palindromic nucleotides (P) additions and exonuclease trimmings observed at 3'-end of V regions, respectively; 5DP and 5DT: the P additions and exonuclease trimmings observed at 5'-end of D genes, respectively; 3DP and 3DT: the P additions and exonuclease trimmings observed at 3'-end of D genes, respectively; 5JP and 5JT: the P additions and exonuclease trimmings observed at 5'-end of J genes, respectively; N1: the non-template randomized nucleotides (N) additions happened at the region between the 3'-end of V gene and the 5'-end of D gene; N2: N additions happened at the region between the 3'-end of D gene and the 5'-end of J gene.

b: Calculated by the logistic regression.
