# Supplementary material for: Decrease of Clone Diversity in IgM Repertoires of HBV Chronically Infected Individuals With High Level of Viral Replication
Source: PubMed Central journal article supplement (PMC7843509; doi:10.3389/fmicb.2020.615669), 2021-01-15
Supplement: Table_9.pdf [file Table_9.pdf]

**Supplementary Table 9. The Occurrence of Junctional Modifications in IgG Repertoires**

| Junctional Modification                                             | Occurrence (%)                      |                                     |                                   |                                    |                                     |                                     |                                     |                                     |                                     |                                     |
|---------------------------------------------------------------------|-------------------------------------|-------------------------------------|-----------------------------------|------------------------------------|-------------------------------------|-------------------------------------|-------------------------------------|-------------------------------------|-------------------------------------|-------------------------------------|
|                                                                     | 3VP                                 | 5DP                                 | 3DP                               | 5JP                                | N1                                  | N2                                  | 3VT                                 | 5DT                                 | 3DT                                 | 5JT                                 |
| <b>HH</b>                                                           | 18.72                               | 2.37                                | 4.97                              | 3.73                               | 89.35                               | 89.15                               | 62.38                               | 91.19                               | 87.04                               | 90.28                               |
| <b>IHB</b>                                                          | 15.65                               | 2.41                                | 5.12                              | 3.61                               | 90.09                               | 87.75                               | 62.95                               | 90.43                               | 86.37                               | 89.73                               |
| <b>CHB</b>                                                          | 16.10                               | 4.23                                | 5.27                              | 3.91                               | 88.75                               | 90.20                               | 66.68                               | 89.80                               | 84.62                               | 91.10                               |
| <i>p</i> , <sup>a</sup><br><b>OR(95%CI)</b><br><b>(HH vs. IHB)</b>  | <2.2E-16,<br>0.805<br>(0.790,0.821) | 0.425,<br>1.019<br>(0.973,1.068)    | 0.058,<br>1.032<br>(0.999,1.066)  | 0.075,<br>0.966<br>(0.930,1.003)   | 2.1E-11,<br>1.083<br>(1.058,1.109)  | <2.2E-16,<br>0.872<br>(0.853,0.892) | 0.001,<br>1.025<br>(1.010,1.040)    | 3.8E-13,<br>0.913<br>(0.890,0.935)  | 6.0E-08,<br>0.944<br>(0.924,0.964)  | 5.3E-07,<br>0.941<br>(0.919,0.964)  |
| <i>p</i> , <sup>a</sup><br><b>OR(95%CI)</b><br><b>(HH vs. CHB)</b>  | <2.2E-16,<br>0.833<br>(0.818,0.849) | <2.2E-16,<br>1.822<br>(1.748,1.900) | 0.0001,<br>1.064<br>(1.030,1.098) | 0.009,<br>1.050<br>(1.012,1.089)   | 8.0E-08,<br>0.940<br>(0.919,0.962)  | <2.2E-16,<br>1.121<br>(1.095,1.147) | <2.2E-16,<br>1.207<br>(1.189,1.225) | <2.2E-16,<br>0.850<br>(0.830,0.871) | <2.2E-16,<br>0.819<br>(0.803,0.836) | 1.7E-15,<br>1.103<br>(1.077,1.130)  |
| <i>p</i> , <sup>a</sup><br><b>OR(95%CI)</b><br><b>(IHB vs. CHB)</b> | 0.0003,<br>1.034<br>(1.016,1.054)   | <2.2E-16,<br>1.788<br>(1.720,1.859) | 0.05,<br>1.031<br>(1.000,1.062)   | 4.0E-06,<br>1.087<br>(1.049,1.126) | <2.2E-16,<br>0.868<br>(0.852,0.885) | <2.2E-16,<br>1.285<br>(1.258,1.313) | <2.2E-16,<br>1.178<br>(1.162,1.195) | 7.0E-10,<br>0.932<br>(0.911,0.953)  | <2.2E-16,<br>0.868<br>(0.852,0.885) | <2.2E-16,<br>1.172<br>(1.146,1.199) |

a: Calculated by the logistic regression.
