# Supplementary material for: Decrease of Clone Diversity in IgM Repertoires of HBV Chronically Infected Individuals With High Level of Viral Replication
Source: PubMed Central journal article supplement (PMC7843509; doi:10.3389/fmicb.2020.615669), 2021-01-15
Supplement: Table_10.pdf [file Table_10.pdf]

**Supplementary Table 10. The Average Length of Nucleotides Added and Trimmed in the Junctional Regions of IgM Repertoires**

| Junctional Modification                               | Average Length (nt) |             |             |             |             |             |             |             |             |             |
|-------------------------------------------------------|---------------------|-------------|-------------|-------------|-------------|-------------|-------------|-------------|-------------|-------------|
|                                                       | 3VP                 | 5DP         | 3DP         | 5JP         | N1          | N2          | 3VT         | 5DT         | 3DT         | 5JT         |
| <b>HH</b>                                             | 1.57 ± 0.75         | 1.64 ± 0.83 | 1.36 ± 0.71 | 1.47 ± 0.80 | 7.03 ± 4.83 | 6.49 ± 4.87 | 2.25 ± 1.59 | 6.62 ± 4.74 | 6.22 ± 4.06 | 6.01 ± 4.77 |
| <b>IHB</b>                                            | 1.55 ± 0.77         | 1.59 ± 0.75 | 1.39 ± 0.72 | 1.46 ± 0.80 | 6.95 ± 4.88 | 6.67 ± 5.05 | 2.25 ± 1.60 | 6.66 ± 4.85 | 6.23 ± 4.12 | 6.12 ± 4.78 |
| <b>CHB</b>                                            | 1.56 ± 0.74         | 1.68 ± 0.92 | 1.37 ± 0.72 | 1.45 ± 0.74 | 6.80 ± 4.81 | 6.34 ± 4.77 | 2.30 ± 1.62 | 6.81 ± 4.97 | 6.19 ± 4.14 | 5.95 ± 4.78 |
| <i>Cohen's d</i> <sup>a</sup><br><b>(HH vs. IHB)</b>  | 0.03                | 0.08        | 0.05        | 0.01        | 0.004       | 0.01        | 0.003       | 0.002       | 0.001       | 0.01        |
| <i>Cohen's d</i> <sup>a</sup><br><b>(HH vs. CHB)</b>  | 0.01                | 0.04        | 0.01        | 0.03        | 0.01        | 0.01        | 0.01        | 0.01        | 0.002       | 0.003       |
| <i>Cohen's d</i> <sup>a</sup><br><b>(IHB vs. CHB)</b> | 0.02                | 0.12        | 0.04        | 0.02        | 0.01        | 0.01        | 0.01        | 0.01        | 0.003       | 0.01        |

a: Calculated by Student's t test; *Cohen's d* Value: when  $d \geq 0.20$ , the difference were considered to be significant.
