# Supplementary material for: Decrease of Clone Diversity in IgM Repertoires of HBV Chronically Infected Individuals With High Level of Viral Replication
Source: PubMed Central journal article supplement (PMC7843509; doi:10.3389/fmicb.2020.615669), 2021-01-15
Supplement: Table_11.pdf [file Table_11.pdf]

**Supplementary Table 11. The Average Length of Nucleotides Added and Trimmed in the Junctional Regions of IgG Repertoires**

| Junctional Modification                               | Average Length (nt) |            |            |            |            |           |            |           |            |            |
|-------------------------------------------------------|---------------------|------------|------------|------------|------------|-----------|------------|-----------|------------|------------|
|                                                       | 3VP                 | 5DP        | 3DP        | 5JP        | N1         | N2        | 3VT        | 5DT       | 3DT        | 5JT        |
| <b>HH</b>                                             | 1.45±0.69           | 1.59±0.84  | 1.27±0.55  | 1.40±0.83  | 7.42±5.52  | 7.37±5.76 | 2.55 ±1.84 | 7.74±5.17 | 6.62±4.19  | 7.49±5.34  |
| <b>IHB</b>                                            | 1.53±0.78           | 1.52±0.70  | 1.18±0.53  | 1.30 ±0.59 | 7.82±5.62  | 7.08±5.33 | 2.73 ±1.92 | 7.72±5.18 | 6.34 ±4.35 | 7.92±5.46  |
| <b>CHB</b>                                            | 1.48±0.70           | 1.55 ±0.64 | 1.31 ±0.58 | 1.33±0.63  | 7.81 ±5.46 | 7.55±5.93 | 2.53 ±1.92 | 7.91±5.63 | 6.37 ±4.29 | 7.92 ±5.52 |
| <b><i>Cohen's d<sup>a</sup></i><br/>(HH vs. IHB)</b>  | 0.15                | 0.12       | 0.29       | 0.19       | 0.01       | 0.009     | 0.05       | 0.005     | 0.02       | 0.01       |
| <b><i>Cohen's d<sup>a</sup></i><br/>(HH vs. CHB)</b>  | 0.08                | 0.07       | 0.14       | 0.13       | 0.01       | 0.005     | 0.006      | 0.06      | 0.01       | 0.01       |
| <b><i>Cohen's d<sup>a</sup></i><br/>(IHB vs. CHB)</b> | 0.08                | 0.08       | 0.41       | 0.07       | 0.0005     | 0.01      | 0.06       | 0.06      | 0.002      | 0.00003    |

a: Calculated by Student's t test; *Cohen's d* Value: when  $d \geq 0.20$ , the difference were considered to be significant.
